# Supplementary material
Source: PubMed Central journal article supplement (PMC7127674)
Supplement: mmc1.pdf [file mmc1.pdf]

## Supporting information file

### Simulating and Forecasting the Cumulative Confirmed Cases of SARS-CoV-2 in China by Boltzmann Function-based Regression Analyses

Xinmiao Fu, Qi Ying, Tieyong Zeng, Tao Long and Yan Wang

## Methods

### *Sources of data*

We collected the daily cumulative number of confirmed cases (from Jan 21, 2020 to Feb 14, 2020) infected by SARS-CoV-2 from official websites of the National Health Commission of China and of health commissions of provinces, municipalities and major cities. Overseas data were not included in our simulation due to the small number of confirmed cases. The cumulative number of confirmed cases of 2003 SARS in China and worldwide were obtained from the official website of WHO.

### *Data fitting with Boltzmann function and estimation of critical dates*

Data were organized in Microsoft Excel and then incorporated into Microcal Origin software (note: 2021 Jan 21 was set as day 1 and so on). The Boltzmann function was applied to data simulation for each set of data regarding different geographic regions (e.g., China, Hubei Province and so on) and parameters of each function were obtained, with the potential total number of confirmed cases being directly given by parameter  $A_2$ . Estimation of critical dates was performed by predicting the cumulative number of confirmed cases in the coming days post Feb 14, 2020, and the key dates were provisionally set when the number of daily new confirmed cases is lower than 0.1% of the potential total number. The Boltzmann function for simulation is expressed as follows:

$$C(x) = A_2 + \frac{A_1 - A_2}{1 + e^{(x-x_0)/dx}} \quad (1)$$

where  $C(x)$  is the cumulative number of confirmed cases at day  $x$ ;  $A_1$ ,  $A_2$ ,  $x_0$ , and  $dx$  are constants. In particular,  $A_2$  represents the estimated potential total number of confirmed cases of SARS-CoV-2. Details of derivation of the Boltzmann function for epidemic analysis are described in the supporting information file.

### *Estimation of uncertainty in the non-linear regression*

A Monte Carlo technique is applied to assess the uncertainty in the estimated total number of confirmed cases due to the uncertainty in the reported number cases. 1000 non-linear regressions were performed with the same time series data but each data point in the time series was perturbed by multiplying with a random scaling factor that represents the relative uncertainty. We assumed that the relative uncertainty follows a single-sided normal distribution with a mean of 1.0 and a standard deviation of 10%. This implies that all reported cases are positive but there is a tendency to miss-reporting some positive cases so that the reported numbers represent a lower limit. The resulting mean and 95% confidence interval (CI) were presented.

### ***Derivation of Boltzmann function for data fitting***

We are interested in the derivation of the Boltzmann function which can be written as,

$$N(t) = A_2 + \frac{A_1 - A_2}{1 + e^{(t-t_0)/\Delta t}}$$

where  $A_1, A_2, t_0$ , and  $\Delta t$  are some suitable constant.

This formula is related to the sigmoid function except for a linear transform. Let us explain why this Boltzmann function is reasonable for explaining the data for the number of virus-infected cases. Readily, we have,  $N(t_0) = \frac{A_1 + A_2}{2}$ ,  $N(-\infty) = A_1$ ,  $N(+\infty) = A_2$ . We can prove a simple result.

**Theorem 1.** Denote  $c = \frac{1}{(A_2 - A_1)\Delta t}$ , then we have

$$\frac{dN(t)}{dt} = c(A_2 - N(t))(N(t) - A_1).$$

*Proof.* Calculate directly, we have,

$$\begin{aligned} \frac{dN(t)}{dt} &= -(A_1 - A_2) \cdot \frac{e^{(t-t_0)/\Delta t}}{(1 + e^{(t-t_0)/\Delta t})^2} \frac{1}{\Delta t} \\ &= \frac{1}{\Delta t} \cdot \frac{A_2 - A_1}{1 + e^{(t-t_0)/\Delta t}} \cdot \left(1 - \frac{1}{1 + e^{(t-t_0)/\Delta t}}\right) \\ &= \frac{1}{\Delta t} \cdot \frac{A_2 - A_1}{1 + e^{(t-t_0)/\Delta t}} \cdot \left(1 - \frac{1}{1 + e^{(t-t_0)/\Delta t}}\right) \\ &= \frac{1}{(A_1 - A_2)\Delta t} (A_2 - N(t))(A_1 - N(t)) \\ &= c(A_2 - N(t))(N(t) - A_1). \end{aligned}$$

The above relation is very interesting. If we define the cumulative infected cases as  $N(t)$ , Boltzmann function states that the increment of the  $N(t)$  is proportional to the number of infected cases (except some infected cases, represented by  $A_1$ , who may not have the potency to infect other healthy people) and the remaining healthy pool.  $A_2$  represents the potential maximal size of infected cases.

Furthermore, we assume that the cumulative number of confirmed cases (designated as  $C(t)$ ) is proportional to the number of infected cases (i.e.,  $N(t)$ ) under specific circumstances, although the former has a lag time behind the latter. Then,  $C(t)$  can also be expressed in the form of Boltzmann function.

## Results

**Table S1 cumulative numbers of confirmed cases of SARS-CoV-2 before and after adjustment**

| date | mainland China |          |          |          | Hubei    |          |          |          | Wuhan    |          |          |          |
|------|----------------|----------|----------|----------|----------|----------|----------|----------|----------|----------|----------|----------|
|      | <i>a</i>       | <i>b</i> | <i>c</i> | <i>d</i> | <i>a</i> | <i>b</i> | <i>c</i> | <i>d</i> | <i>a</i> | <i>b</i> | <i>c</i> | <i>d</i> |
| 1/21 | 440            |          | 440      | 604      | 375      |          | 375      | 539      |          |          |          |          |
| 1/22 | 571            |          | 571      | 765      | 444      |          | 444      | 638      |          |          |          |          |
| 1/23 | 830            |          | 830      | 1069     | 549      |          | 549      | 788      | 459      |          | 459      | 758      |
| 1/24 | 1287           |          | 1287     | 1605     | 729      |          | 729      | 1047     | 572      |          | 572      | 945      |
| 1/25 | 1975           |          | 1975     | 2434     | 1052     |          | 1052     | 1511     | 618      |          | 618      | 1020     |
| 1/26 | 2744           |          | 2744     | 3365     | 1423     |          | 1423     | 2044     | 698      |          | 698      | 1153     |
| 1/27 | 4515           |          | 4515     | 5699     | 2714     |          | 2714     | 3898     | 1590     |          | 1590     | 2625     |
| 1/28 | 5974           |          | 5974     | 7524     | 3554     |          | 3554     | 5104     | 1905     |          | 1905     | 3146     |
| 1/29 | 7711           |          | 7711     | 9711     | 4586     |          | 4586     | 6586     | 2261     |          | 2261     | 3733     |
| 1/30 | 9692           |          | 9692     | 12224    | 5806     |          | 5806     | 8338     | 2639     |          | 2639     | 4358     |
| 1/31 | 11791          |          | 11791    | 14911    | 7153     |          | 7153     | 10273    | 3215     |          | 3215     | 5309     |
| 2/1  | 14380          |          | 14380    | 18337    | 9074     |          | 9074     | 13031    | 4109     |          | 4109     | 6785     |
| 2/2  | 17205          |          | 17205    | 22080    | 11177    |          | 11177    | 16052    | 5142     |          | 5142     | 8491     |
| 2/3  | 20438          |          | 20438    | 26335    | 13522    |          | 13522    | 19419    | 6384     |          | 6384     | 10541    |
| 2/4  | 24324          |          | 24324    | 31598    | 16678    |          | 16678    | 23952    | 8351     |          | 8351     | 13789    |
| 2/5  | 28018          |          | 28018    | 36594    | 19665    |          | 19665    | 28241    | 10117    |          | 10117    | 16706    |
| 2/6  | 31161          |          | 31161    | 40805    | 22112    |          | 22112    | 31756    | 11618    |          | 11618    | 19184    |
| 2/7  | 34546          |          | 34546    | 45429    | 24953    |          | 24953    | 35836    | 13603    |          | 13603    | 22462    |
| 2/8  | 37198          |          | 37198    | 49017    | 27100    |          | 27100    | 38919    | 14982    |          | 14982    | 24739    |
| 2/9  | 40171          |          | 40171    | 53094    | 29631    |          | 29631    | 42554    | 16902    |          | 16902    | 27909    |
| 2/10 | 42638          |          | 42638    | 56475    | 31728    |          | 31728    | 45565    | 18454    |          | 18454    | 30472    |
| 2/11 | 44750          |          | 44750    | 59302    | 33366    |          | 33366    | 47918    | 19558    |          | 19558    | 32295    |
| 2/12 | 59804          | 13332    | 46472    | 61681    | 48206    | 13332    | 34874    | 50083    | 32994    | 12364    | 20630    | 34065    |
| 2/13 | 63851          | 15384    | 48467    | 64430    | 51986    | 15384    | 36602    | 52565    | 35991    | 14031    | 21960    | 36261    |
| 2/14 | 66496          | 16522    | 49974    | 66496    | 54406    | 16522    | 37884    | 54406    | 37914    | 14953    | 22961    | 37914    |

*a*: reported cumulative number of confirmed cases.

*b*: cumulative number of confirmed cases determined by clinical features.

*c*: cumulative cases without those determined by clinical features.

*d*: adjusted cumulative number of confirmed cases for fitting are colored in red.

**Figure S1**

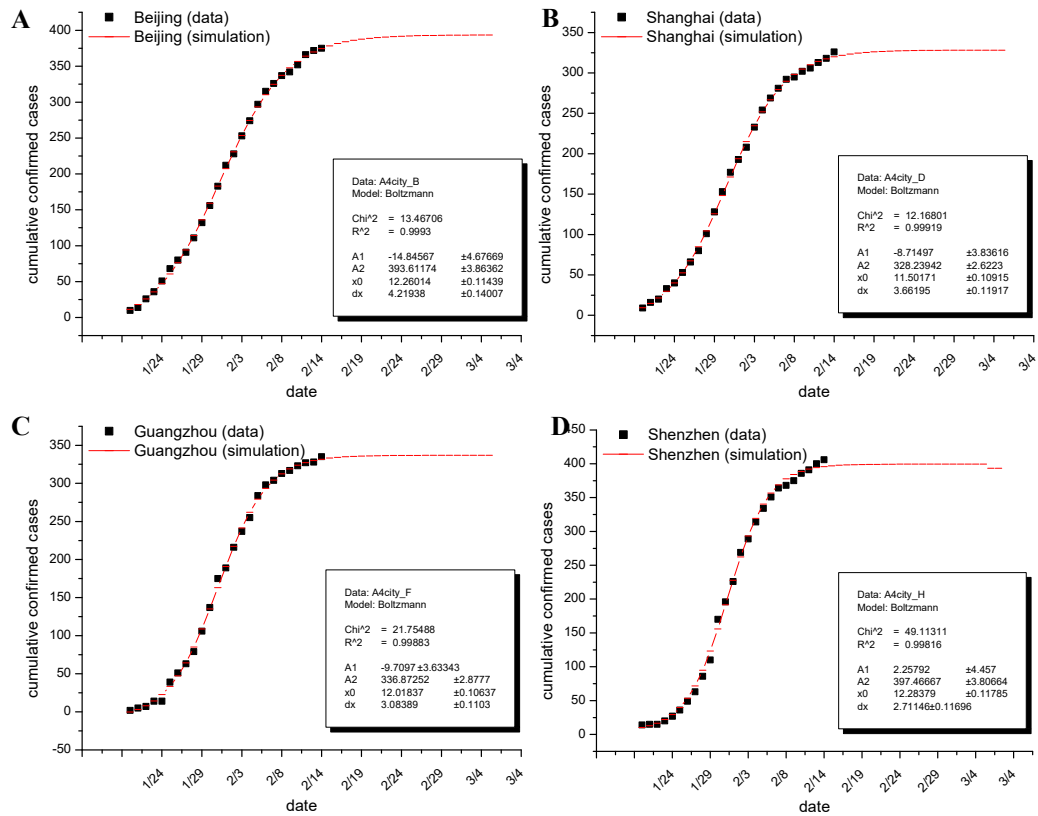

**Figure S1 Fitting the cumulative number of confirmed cases from the top-4 major cities to Boltzmann function**

Cumulative number of confirmed cases of SARS-CoV-2 as of Feb 14, 2020, in top4 major cities of mainland China (Beijing, panel A; Shanghai, panel B; Guangzhou, panel C; Shenzhen, panel D), are shown as black squares, and the simulation results from Boltzmann function are plotted as red short lines and parameters of each established function are shown in inserts.

Figure S2

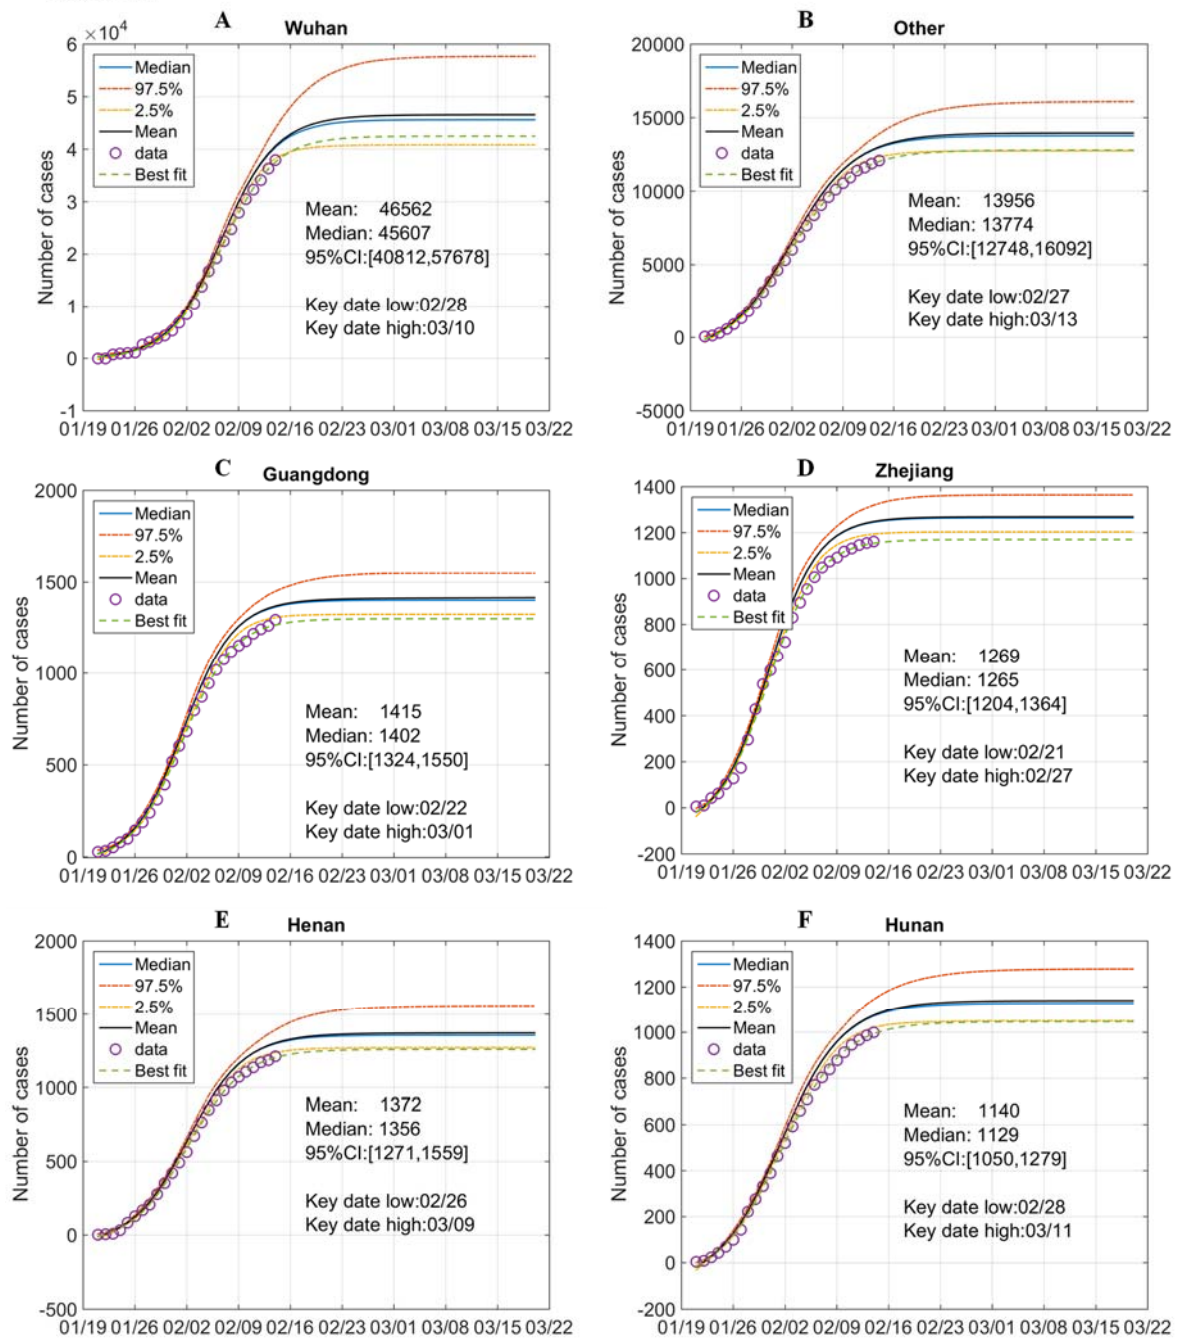

**Figure S2 Analysis of the uncertainty of the estimated confirmed cases**

Data of Wuhan City (panel A), of other provinces than Hubei (panel B), of Guangdong (panel C), of Zhejiang (panel D), of Henan (panel E) and of Hunan (panel F) were fitted to Boltzmann function assuming that the relative uncertainty of the data follows a single-sided normal distribution with a mean of 1.0 and a standard deviation of 10%. Original data are shown as circles; simulated results are presented as colored lines as indicated. Inserts show key statistics information. The key date is defined as the date when the number of daily new confirmed cases is less than 0.1% of the potential total number. The high and low key dates were determined by the simulated curve of CI at 2.5% and 97.5%, respectively.

Figure S3

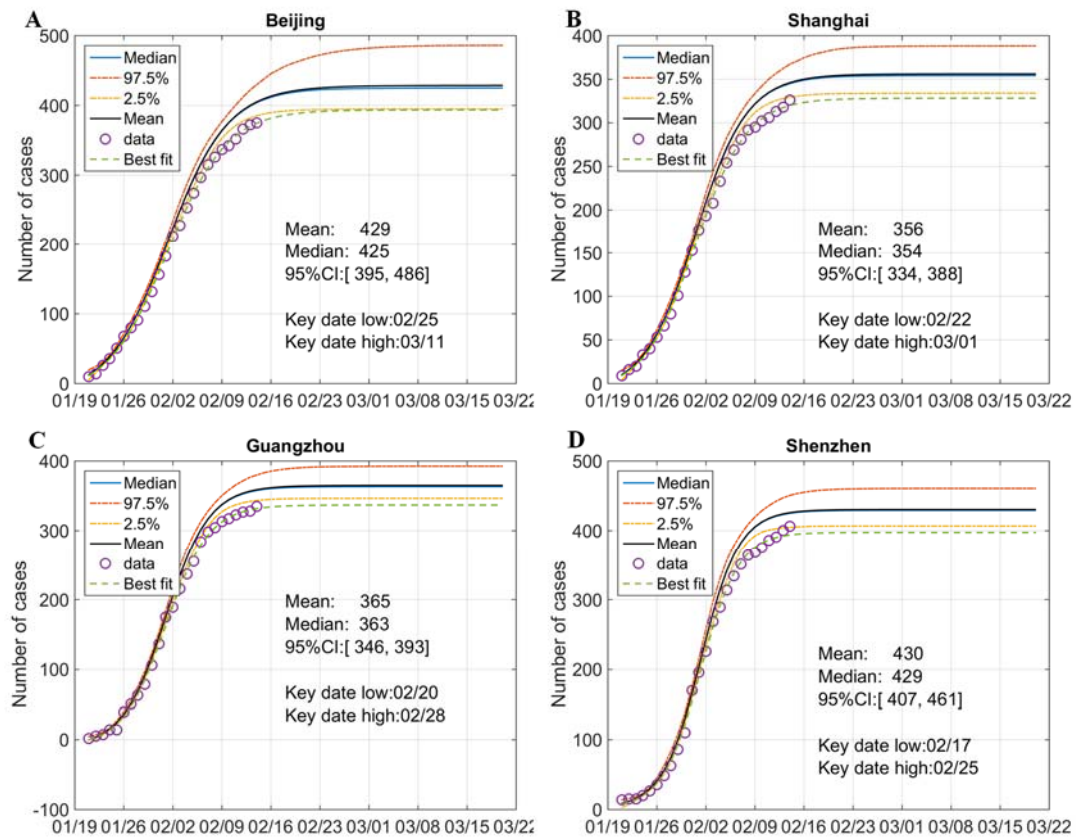

Figure S3 Analysis of the uncertainty of confirmed cases for the top 4 major cities of China

Data of Beijing (panel A), of Shanghai (panel B), Guangzhou (panel C) and Shenzhen (panel D) were fitted to Boltzmann function as described in Fig. S2.
